# Supplementary material
Source: MDPI journal article supplement (https://www.mdpi.com/2072-4292/14/9/1964)
Supplement: s1 [file s1]

## Supplementary Materials

**Table S1:** Summary of station name, location and elevation of gauge stations.

| No. | Station Name | Latitude | Longitude | Elevation (m) |
|-----|--------------|----------|-----------|---------------|
| 1   | Moyale       | 3.533    | 39.033    | 1112.5        |
| 2   | Thika        | −0.960   | 37.05     | 1463          |
| 3   | Dagoretti    | −1.280   | 36.68     | 1850          |
| 4   | Msabaha      | −3.310   | 40.01     | 28.5          |
| 5   | Kabete       | −1.250   | 36.76     | 1780          |
| 6   | JKIA         | 1.330    | 36.91     | 1624.0        |
| 7   | Mwea         | −0.680   | 37.35     | 1280          |
| 8   | Kakamega     | 0.278    | 34.764    | 483.1         |
| 9   | Narok        | −1.153   | 35.768    | 1927          |
| 10  | Nakuru       | −0.271   | 36.104    | 1914.6        |
| 11  | Lodwar       | 3.118611 | 35.590    | 502           |
| 12  | Kitale       | 1.003    | 34.986    | 1855.2        |
| 13  | Kericho      | −0.419   | 35.251    | 1982.1        |
| 14  | EldoretAp    | 0.531    | 35.268    | 2148.9        |
| 15  | Eldoret      | 0.404    | 35.237    | 2116.9        |
| 16  | Suba         | −0.400   | 34.148    | 1143          |
| 17  | Kisumu       | −0.085   | 34.735    | 1170.9        |
| 18  | Kisii        | −0.669   | 34.701    | 1596          |
| 19  | Wajir        | 1.748    | 40.059    | 257           |
| 20  | Mandera      | 3.930    | 41.851    | 245.4         |
| 21  | Meru         | 0.052    | 37.651    | 1626.5        |
| 22  | Marsabit     | 2.347    | 37.984    | 1339.6        |
| 23  | Makindu      | −2.286   | 37.834    | 999.1         |
| 24  | Embu         | −0.501   | 37.496    | 1508.5        |
| 25  | Voi          | −3.382   | 38.576    | 574           |
| 26  | Mombassa     | −4.046   | 39.563    | 5             |
| 27  | Malindi      | −3.223   | 40.101    | 26.8          |
| 28  | Lamu         | −2.227   | 40.848    | 9             |
| 29  | Garissa      | −0.476   | 39.648    | 143           |
| 30  | Nyeri        | −0.443   | 36.981    | 1798          |

The RMSE measures the average error magnitude, giving greater weight to the larger errors than is done by the mean absolute error.

$$RMSE = \sqrt{\frac{1}{N} \sum_{i=1}^N (y_i - x_i)^2} \quad (S1)$$

where  $x_i$  and  $y_i$  represent WRF outputs and PERSIANN-CCS-CDR datasets.

**Table S2.** K-index values for the probability of heavy PRE.

| K-index (°C) | Probability of PRE (%) |
|--------------|------------------------|
| <15          | 0                      |
| 15–20        | <20                    |
| 21–25        | 20–40                  |
| 26–30        | 40–60                  |
| 31–35        | 60–80                  |
| 36–40        | 80–90                  |
| >40          | >90                    |

**Table S3.** TTs values for the potential of heavy PRE.

| TTs   | Potential of PRE                                    |
|-------|-----------------------------------------------------|
| 44–45 | Isolated to few moderate                            |
| 46–47 | Scattered moderate, a few heavy and isolated severe |
| 50–51 | Scattered heavy, a few severe                       |
| 52–55 | Scattered to numerous heavy                         |
| >55   | Numerous heavy, scattered severe                    |

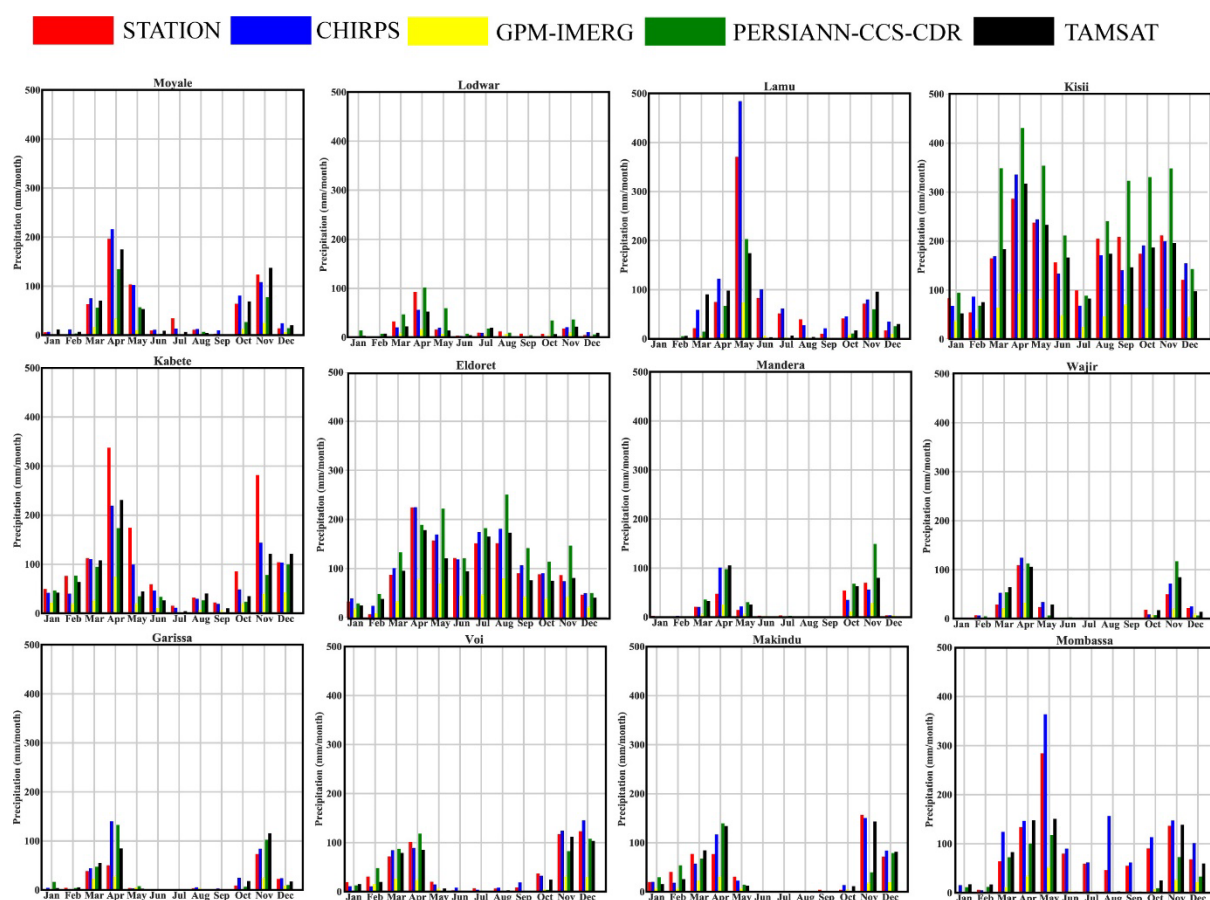

**Figure S1:** Observed and satellite estimated monthly PRE annual cycle over Kenya at sampled stations.

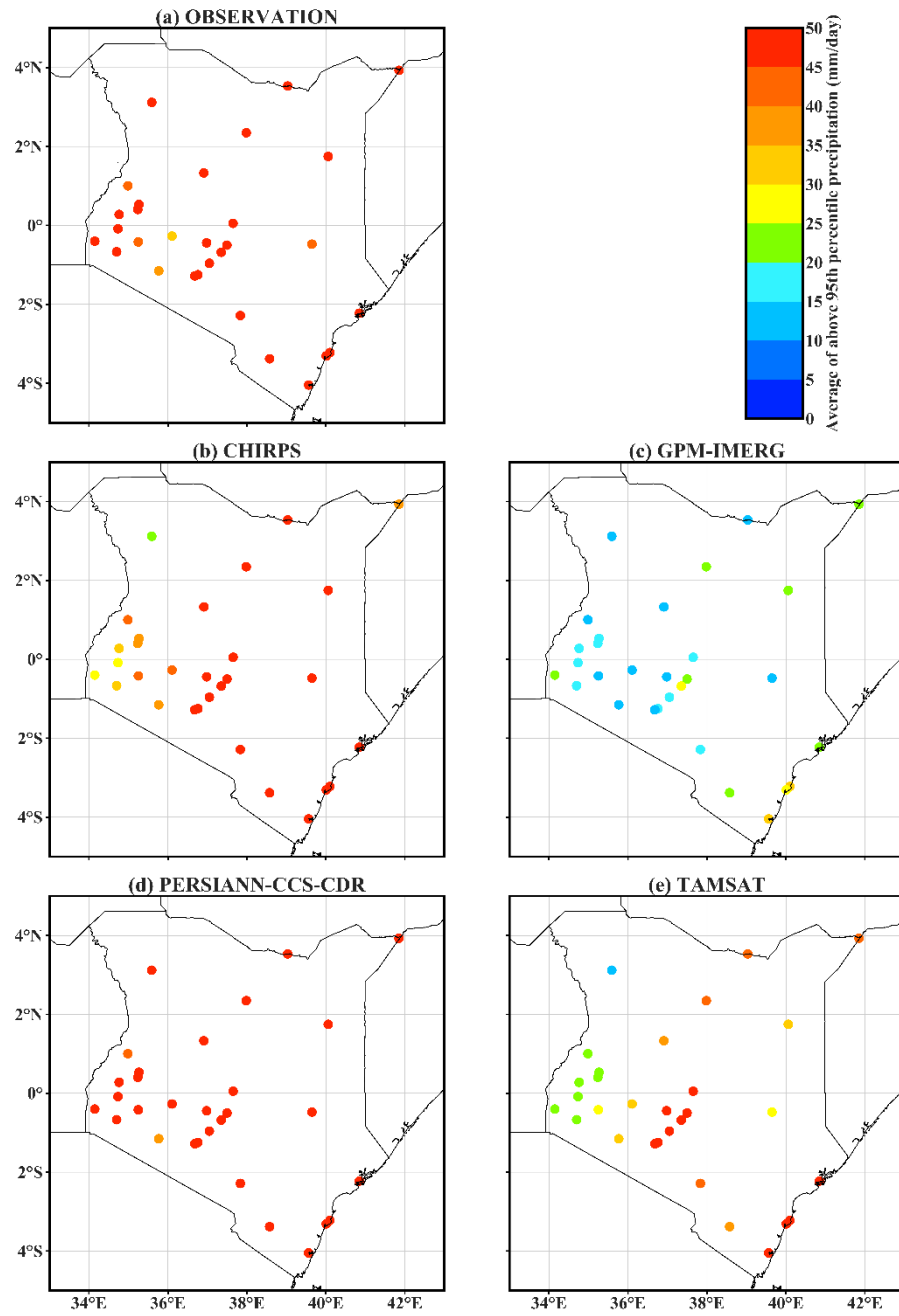

**Figure S2.** Observation and satellite estimate of the average rainfall quantities above top 95th percentile over Kenya (a) OBSERVATION, (b) CHIRPS, (c) GPM-IMERG, (d) PERSIANN-CCS-CDR, (e) TAMSAT.

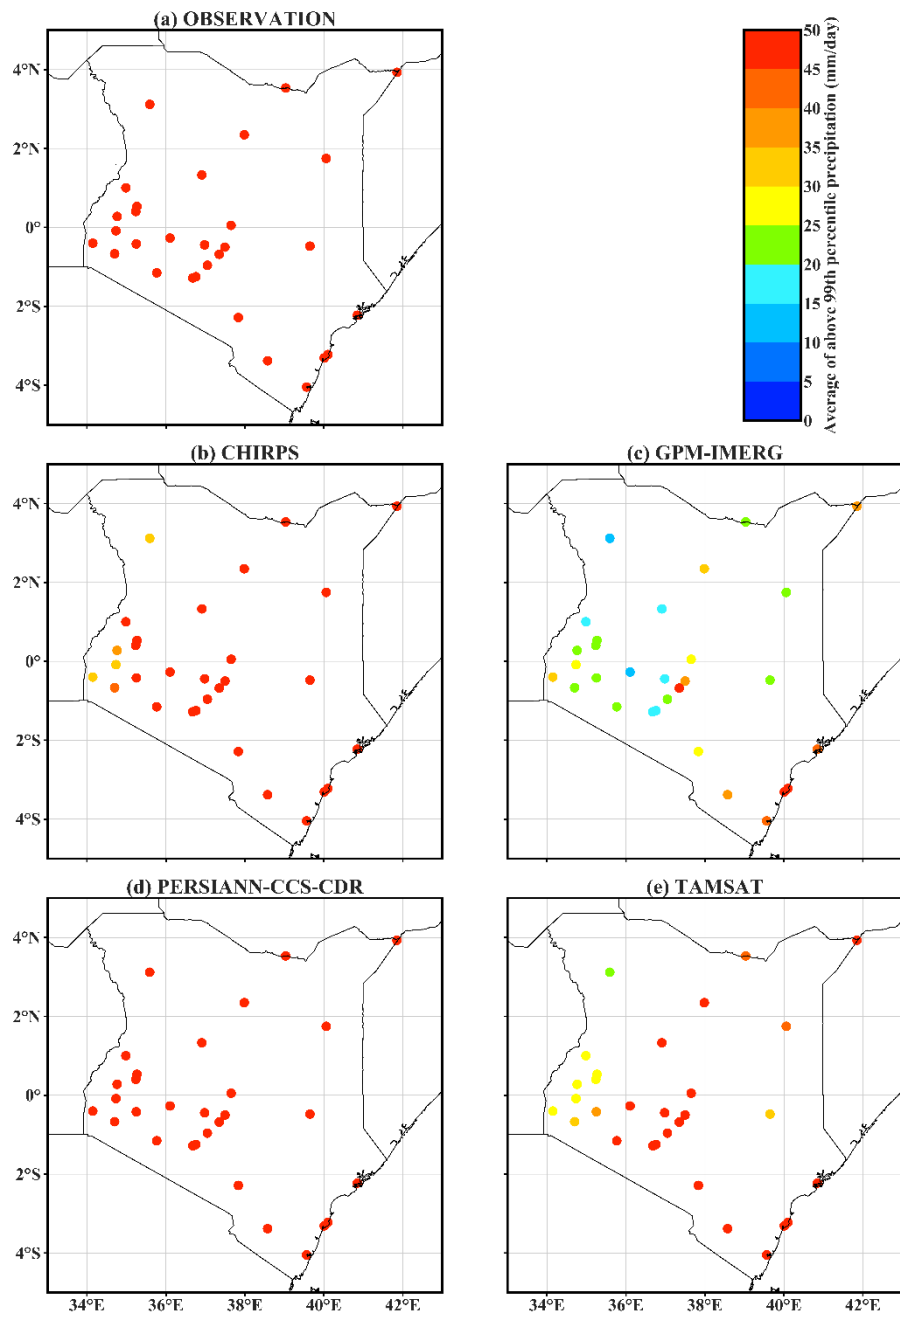

**Figure S3.** Same as Figure S2 but at top 99th percentile.

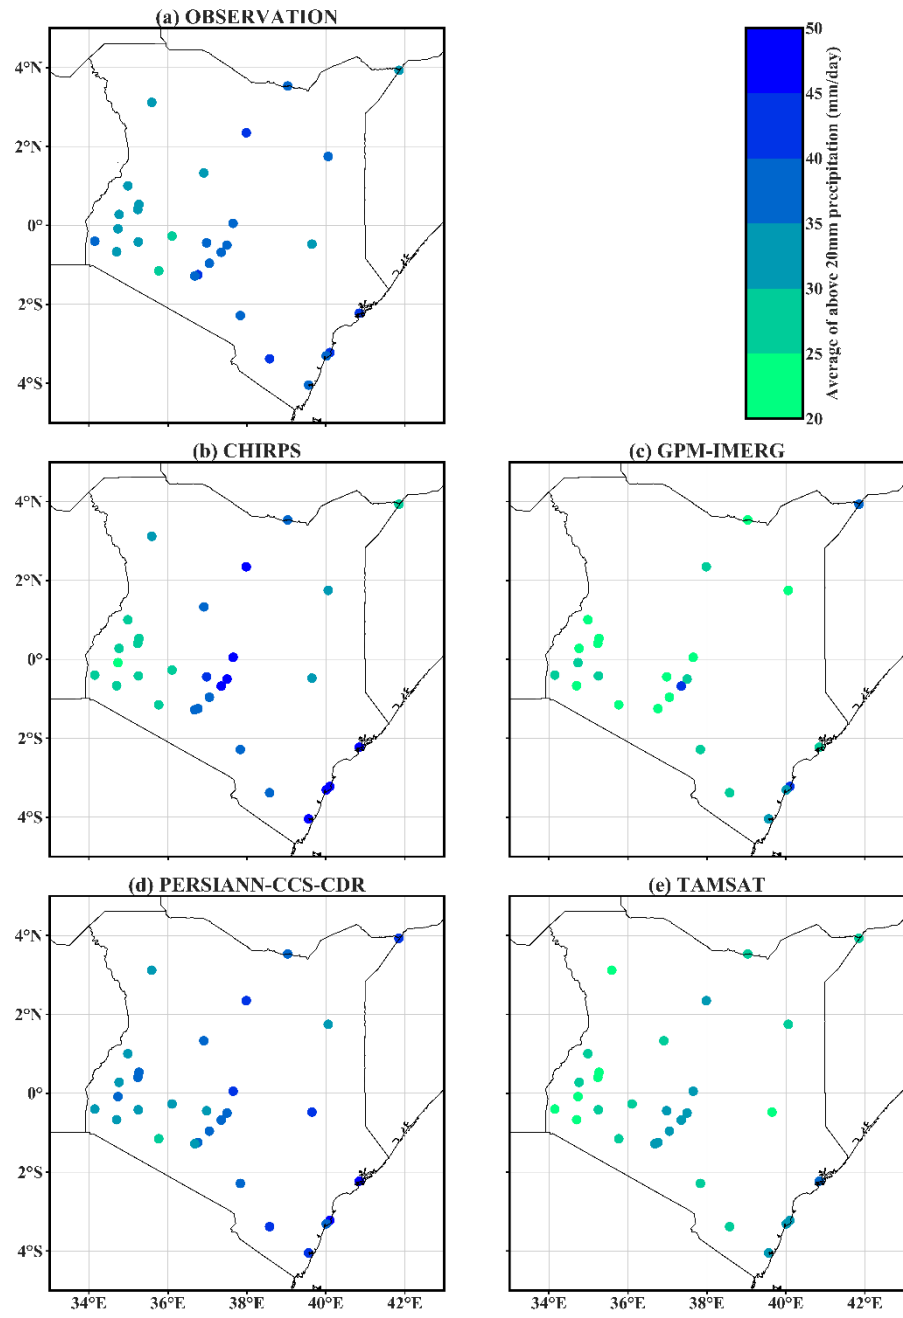

**Figure S4.** Same as Figure S2 but above R20 mm.

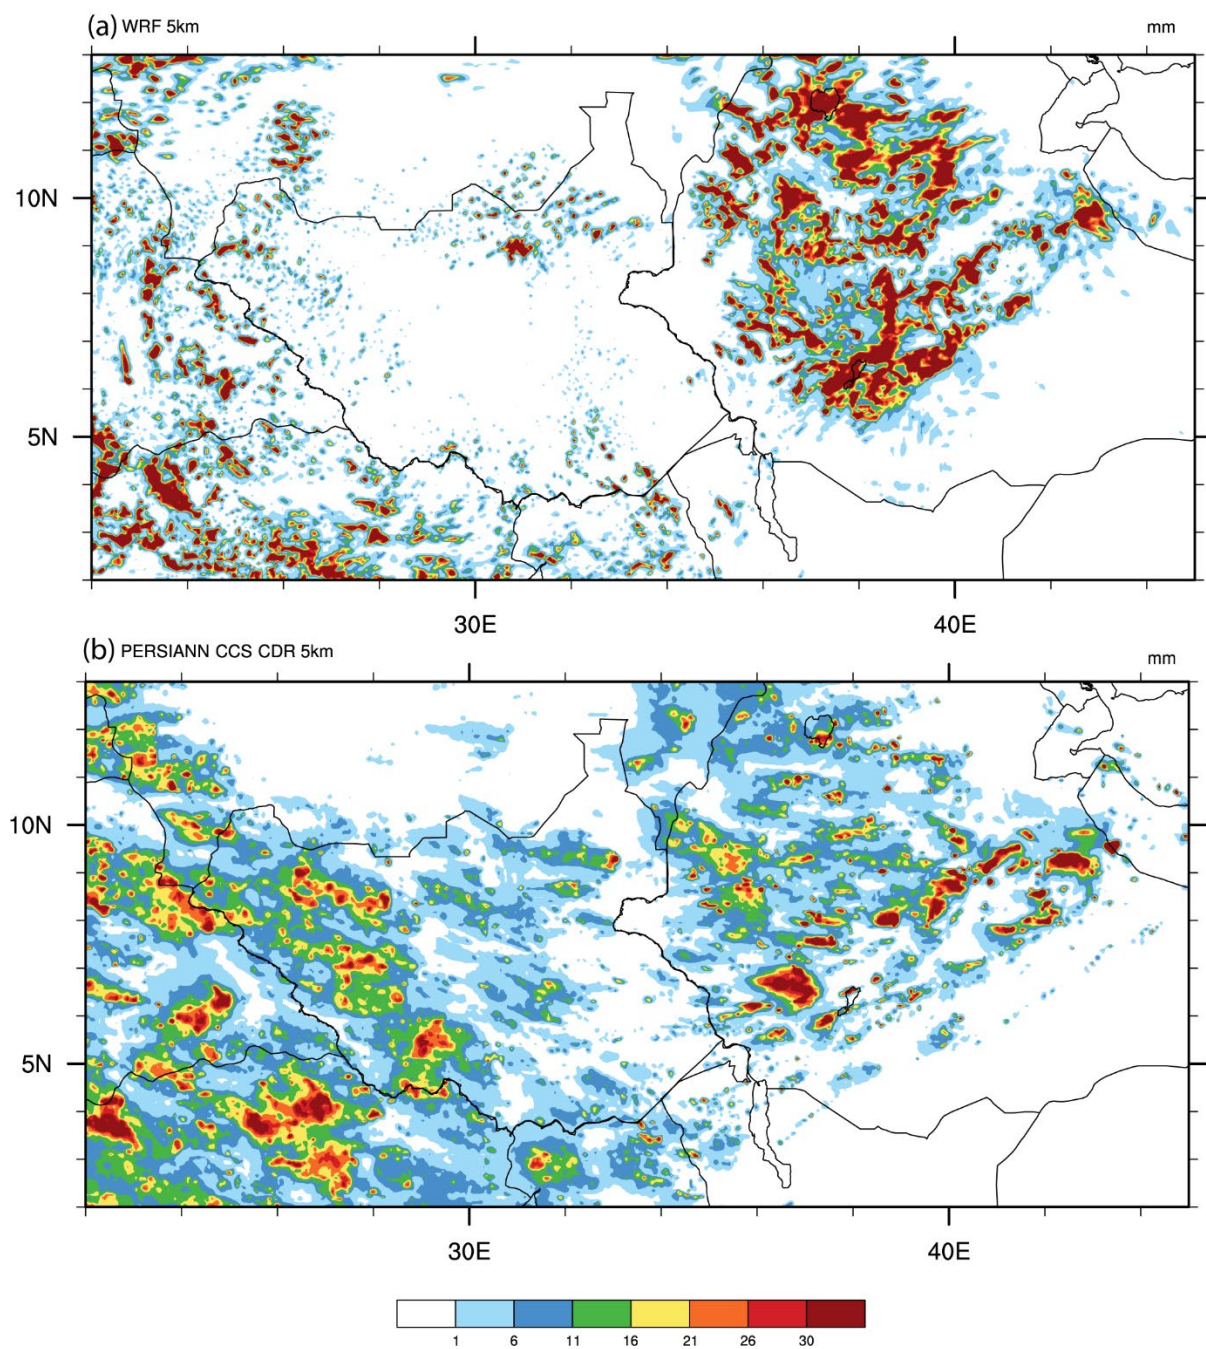

**Figure S5.** Distribution of simulated and observed precipitation (mm/d) on September 01, 2020 over East Africa: (a) WRF (top left), PERSIANN-CDR (top right), (b) CMORPH (bottom left) and TAM-SAT (bottom right).



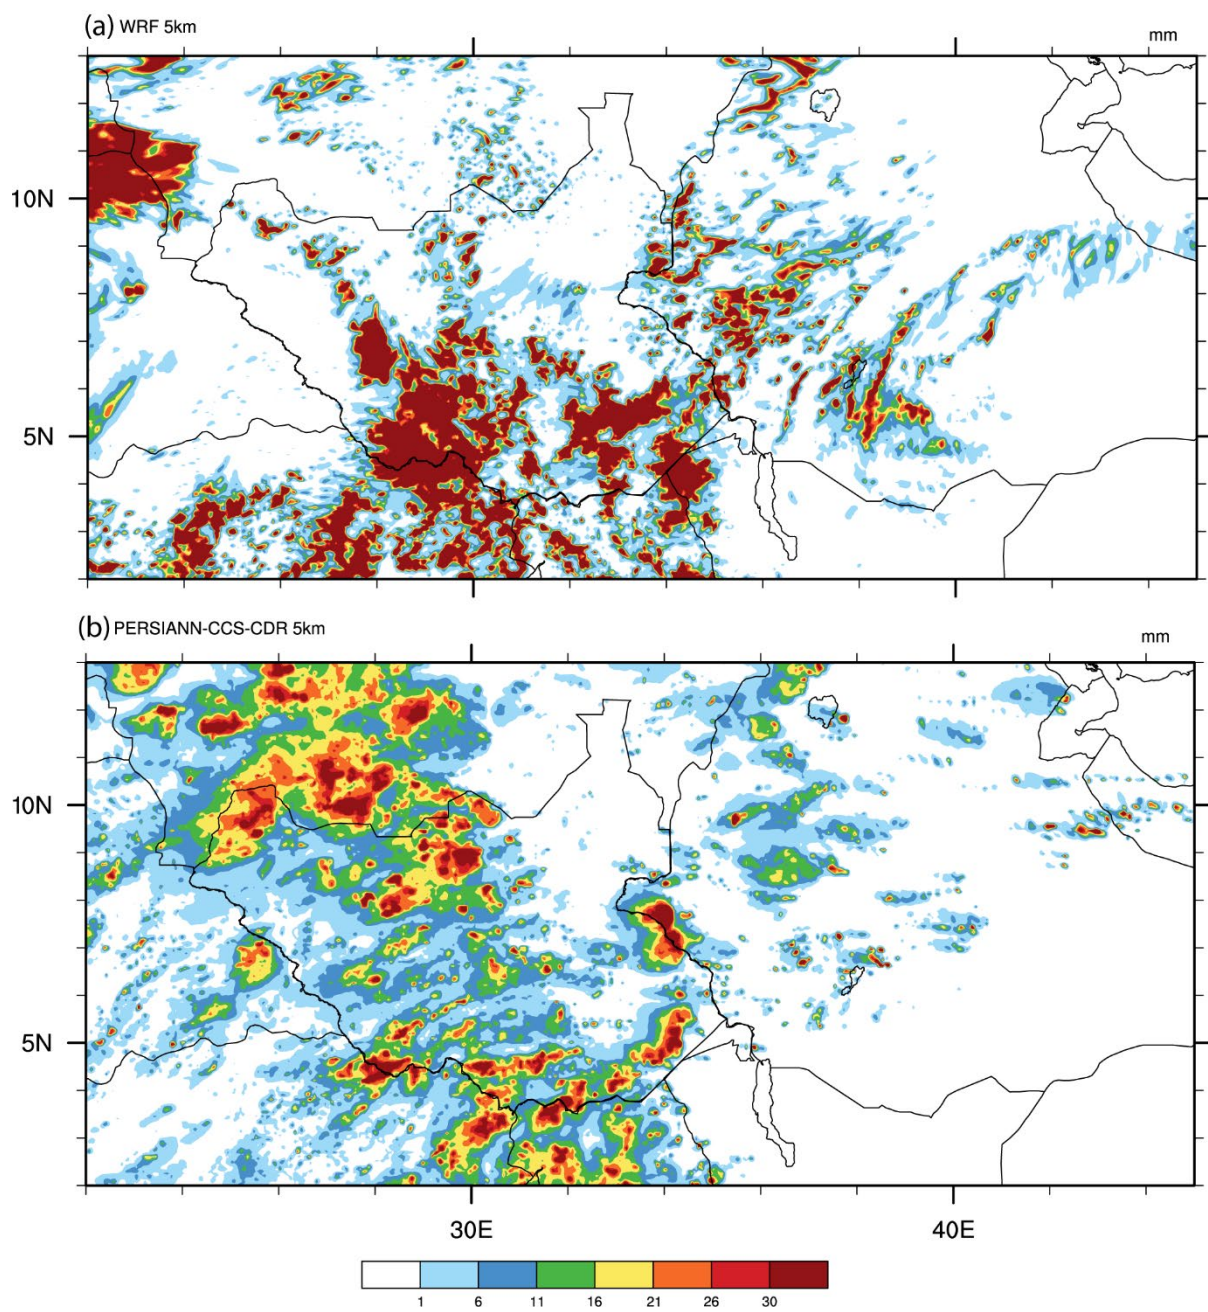

**Figure S6.** Same as Figure S5, but for September 06, 2020.
